# Supplementary material for: Association of extended myositis panel results, clinical features, and diagnoses: a single-center retrospective observational study
Source: Springer Nature journal article supplement (doi:10.1007/s00296-021-05012-0), 2021-10-04
Supplement: MOESM1 [file 19726460]

|            | <b>Mi2b<br/>(N=3)</b> | <b>MDA5<br/>(N=1)</b> | <b>NXP2<br/>(N=2)</b> | <b>SAE1<br/>(N=1)</b> | <b>Jo-1 (N=2)</b> | <b>SRP (N=2)</b> | <b>PL-7<br/>(N=2)</b> | <b>PL-12<br/>(N=4)</b> | <b>EJ<br/>(N=2)</b> | <b>OJ (N=2)</b> | <b>Total<br/>(N=21)</b> |
|------------|-----------------------|-----------------------|-----------------------|-----------------------|-------------------|------------------|-----------------------|------------------------|---------------------|-----------------|-------------------------|
| ILD        |                       |                       |                       |                       |                   |                  |                       |                        |                     |                 |                         |
| <b>No</b>  | 3.0 (100.0%)          | 1.0 (100.0%)          | 2.0 (100.0%)          | 1.0<br>(100.0%)       | 0.0 (0.0%)        | 1.0 (50.0%)      | 0.0 (0.0%)            | 1.0 (25.0%)            | 1.0 (50.0%)         | 1.0 (50.0%)     | 11.0 (52.4%)            |
| <b>Yes</b> | 0.0 (0.0%)            | 0.0 (0.0%)            | 0.0 (0.0%)            | 0.0 (0.0%)            | 2.0 (100.0%)      | 1.0 (50.0%)      | 2.0<br>(100.0%)       | 3.0 (75.0%)            | 1.0 (50.0%)         | 1.0 (50.0%)     | 10.0 (47.6%)            |
| Arthritis  |                       |                       |                       |                       |                   |                  |                       |                        |                     |                 |                         |
| <b>No</b>  | 3.0 (100.0%)          | 1.0 (100.0%)          | 2.0 (100.0%)          | 1.0<br>(100.0%)       | 2.0 (100.0%)      | 2.0 (100.0%)     | 1.0 (50.0%)           | 3.0 (75.0%)            | 2.0<br>(100.0%)     | 1.0 (50.0%)     | 18.0 (85.7%)            |
| <b>Yes</b> | 0.0 (0.0%)            | 0.0 (0.0%)            | 0.0 (0.0%)            | 0.0 (0.0%)            | 0.0 (0.0%)        | 0.0 (0.0%)       | 1.0 (50.0%)           | 1.0 (25.0%)            | 0.0 (0.0%)          | 1.0 (50.0%)     | 3.0 (14.3%)             |
| Arthralgia |                       |                       |                       |                       |                   |                  |                       |                        |                     |                 |                         |
| <b>No</b>  | 2.0 (66.7%)           | 0.0 (0.0%)            | 1.0 (50.0%)           | 1.0<br>(100.0%)       | 2.0 (100.0%)      | 2.0 (100.0%)     | 1.0 (50.0%)           | 3.0 (75.0%)            | 1.0 (50.0%)         | 1.0 (50.0%)     | 14.0 (66.7%)            |
| <b>Yes</b> | 1.0 (33.3%)           | 1.0 (100.0%)          | 1.0 (50.0%)           | 0.0 (0.0%)            | 0.0 (0.0%)        | 0.0 (0.0%)       | 1.0 (50.0%)           | 1.0 (25.0%)            | 1.0 (50.0%)         | 1.0 (50.0%)     | 7.0 (33.3%)             |
| myositis   |                       |                       |                       |                       |                   |                  |                       |                        |                     |                 |                         |
| <b>No</b>  | 3.0 (100.0%)          | 1.0 (100.0%)          | 1.0 (50.0%)           | 0.0 (0.0%)            | 2.0 (100.0%)      | 2.0 (100.0%)     | 1.0 (50.0%)           | 4.0 (100.0%)           | 2.0<br>(100.0%)     | 1.0 (50.0%)     | 17.0 (81.0%)            |
| <b>Yes</b> | 0.0 (0.0%)            | 0.0 (0.0%)            | 1.0 (50.0%)           | 1.0<br>(100.0%)       | 0.0 (0.0%)        | 0.0 (0.0%)       | 1.0 (50.0%)           | 0.0 (0.0%)             | 0.0 (0.0%)          | 1.0 (50.0%)     | 4.0 (19.0%)             |
| Raynaud    |                       |                       |                       |                       |                   |                  |                       |                        |                     |                 |                         |
| <b>No</b>  | 3.0 (100.0%)          | 1.0 (100.0%)          | 2.0 (100.0%)          | 1.0<br>(100.0%)       | 1.0 (50.0%)       | 1.0 (50.0%)      | 1.0 (50.0%)           | 4.0 (100.0%)           | 2.0<br>(100.0%)     | 2.0<br>(100.0%) | 18.0 (85.7%)            |
| <b>Yes</b> | 0.0 (0.0%)            | 0.0 (0.0%)            | 0.0 (0.0%)            | 0.0 (0.0%)            | 1.0 (50.0%)       | 1.0 (50.0%)      | 1.0 (50.0%)           | 0.0 (0.0%)             | 0.0 (0.0%)          | 0.0 (0.0%)      | 3.0 (14.3%)             |
| cutaneous  |                       |                       |                       |                       |                   |                  |                       |                        |                     |                 |                         |
| <b>No</b>  | 2.0 (66.7%)           | 0.0 (0.0%)            | 1.0 (50.0%)           | 0.0 (0.0%)            | 2.0 (100.0%)      | 1.0 (50.0%)      | 0.0 (0.0%)            | 3.0 (75.0%)            | 2.0<br>(100.0%)     | 1.0 (50.0%)     | 12.0 (57.1%)            |
| <b>Yes</b> | 1.0 (33.3%)           | 1.0 (100.0%)          | 1.0 (50.0%)           | 1.0<br>(100.0%)       | 0.0 (0.0%)        | 1.0 (50.0%)      | 2.0<br>(100.0%)       | 1.0 (25.0%)            | 0.0 (0.0%)          | 1.0 (50.0%)     | 9.0 (42.9%)             |
| malignancy |                       |                       |                       |                       |                   |                  |                       |                        |                     |                 |                         |
| <b>No</b>  | 3.0 (100.0%)          | 1.0 (100.0%)          | 2.0 (100.0%)          | 1.0<br>(100.0%)       | 2.0 (100.0%)      | 1.0 (50.0%)      | 2.0<br>(100.0%)       | 3.0 (75.0%)            | 2.0<br>(100.0%)     | 2.0<br>(100.0%) | 19.0 (90.5%)            |
| <b>Yes</b> | 0.0 (0.0%)            | 0.0 (0.0%)            | 0.0 (0.0%)            | 0.0 (0.0%)            | 0.0 (0.0%)        | 1.0 (50.0%)      | 0.0 (0.0%)            | 1.0 (25.0%)            | 0.0 (0.0%)          | 0.0 (0.0%)      | 2.0 (9.5%)              |

Supplementary table 1: clinical associations of strong-positive MSA

|            | <b>PMScl (100/75)<br/>(N=4)</b> | <b>U1snRNP<br/>(N=2)</b> | <b>Ku<br/>(N=2)</b> | <b>Ro52<br/>(N=28)</b> | <b>Total (N=36)</b> |
|------------|---------------------------------|--------------------------|---------------------|------------------------|---------------------|
| ILD        |                                 |                          |                     |                        |                     |
| <b>No</b>  | 3.0 (75.0%)                     | 2.0 (100.0%)             | 2.0 (100.0%)        | 19.0 (67.9%)           | 26.0 (72.2%)        |
| <b>Yes</b> | 1.0 (25.0%)                     | 0.0 (0.0%)               | 0.0 (0.0%)          | 9.0 (32.1%)            | 10.0 (27.8%)        |
| Arthritis  |                                 |                          |                     |                        |                     |
| <b>No</b>  | 4.0 (100.0%)                    | 0.0 (0.0%)               | 2.0 (100.0%)        | 24.0 (85.7%)           | 30.0 (83.3%)        |
| <b>Yes</b> | 0.0 (0.0%)                      | 2.0 (100.0%)             | 0.0 (0.0%)          | 4.0 (14.3%)            | 6.0 (16.7%)         |
| Arthralgia |                                 |                          |                     |                        |                     |
| <b>No</b>  | 4.0 (100.0%)                    | 0.0 (0.0%)               | 0.0 (0.0%)          | 15.0 (53.6%)           | 19.0 (52.8%)        |
| <b>Yes</b> | 0.0 (0.0%)                      | 2.0 (100.0%)             | 2.0 (100.0%)        | 13.0 (46.4%)           | 17.0 (47.2%)        |
| myositis   |                                 |                          |                     |                        |                     |
| <b>No</b>  | 3.0 (75.0%)                     | 1.0 (50.0%)              | 2.0 (100.0%)        | 26.0 (92.9%)           | 32.0 (88.9%)        |
| <b>Yes</b> | 1.0 (25.0%)                     | 1.0 (50.0%)              | 0.0 (0.0%)          | 2.0 (7.1%)             | 4.0 (11.1%)         |
| Raynaud    |                                 |                          |                     |                        |                     |
| <b>No</b>  | 3.0 (75.0%)                     | 1.0 (50.0%)              | 2.0 (100.0%)        | 24.0 (85.7%)           | 30.0 (83.3%)        |
| <b>Yes</b> | 1.0 (25.0%)                     | 1.0 (50.0%)              | 0.0 (0.0%)          | 4.0 (14.3%)            | 6.0 (16.7%)         |
| cutaneous  |                                 |                          |                     |                        |                     |
| <b>No</b>  | 2.0 (50.0%)                     | 1.0 (50.0%)              | 2.0 (100.0%)        | 20.0 (71.4%)           | 25.0 (69.4%)        |
| <b>Yes</b> | 2.0 (50.0%)                     | 1.0 (50.0%)              | 0.0 (0.0%)          | 8.0 (28.6%)            | 11.0 (30.6%)        |
| malignancy |                                 |                          |                     |                        |                     |
| <b>No</b>  | 4.0 (100.0%)                    | 2.0 (100.0%)             | 2.0 (100.0%)        | 24.0 (85.7%)           | 32.0 (88.9%)        |
| <b>Yes</b> | 0.0 (0.0%)                      | 0.0 (0.0%)               | 0.0 (0.0%)          | 4.0 (14.3%)            | 4.0 (11.1%)         |

Supplementary table 2: clinical associations of strong-positive MAA

|            | <b>Mi2a<br/>(N=3)</b> | <b>Mi2b<br/>(N=6)</b> | <b>TIF1<br/>(N=1)</b> | <b>MDA5<br/>(N=1)</b> | <b>NXP2<br/>(N=1)</b> | <b>SAE1<br/>(N=3)</b> | <b>SRP<br/>(N=3)</b> | <b>PL-7<br/>(N=2)</b> | <b>PL-12<br/>(N=2)</b> | <b>OJ (N=1)</b> | <b>Total<br/>(N=23)</b> |
|------------|-----------------------|-----------------------|-----------------------|-----------------------|-----------------------|-----------------------|----------------------|-----------------------|------------------------|-----------------|-------------------------|
| ILD        |                       |                       |                       |                       |                       |                       |                      |                       |                        |                 |                         |
| <b>No</b>  | 2.0<br>(66.7%)        | 4.0<br>(66.7%)        | 1.0<br>(100.0%)       | 0.0 (0.0%)            | 0.0 (0.0%)            | 2.0<br>(66.7%)        | 0.0 (0.0%)           | 2.0<br>(100.0%)       | 1.0<br>(50.0%)         | 1.0<br>(100.0%) | 13.0<br>(56.5%)         |
| <b>Yes</b> | 1.0<br>(33.3%)        | 2.0<br>(33.3%)        | 0.0 (0.0%)            | 1.0<br>(100.0%)       | 1.0<br>(100.0%)       | 1.0<br>(33.3%)        | 3.0<br>(100.0%)      | 0.0 (0.0%)            | 1.0<br>(50.0%)         | 0.0 (0.0%)      | 10.0<br>(43.5%)         |
| Arthritis  |                       |                       |                       |                       |                       |                       |                      |                       |                        |                 |                         |
| <b>No</b>  | 2.0<br>(66.7%)        | 6.0<br>(100.0%)       | 1.0<br>(100.0%)       | 1.0<br>(100.0%)       | 1.0<br>(100.0%)       | 3.0<br>(100.0%)       | 3.0<br>(100.0%)      | 1.0<br>(50.0%)        | 2.0<br>(100.0%)        | 0.0 (0.0%)      | 20.0<br>(87.0%)         |
| <b>Yes</b> | 1.0<br>(33.3%)        | 0.0 (0.0%)            | 0.0 (0.0%)            | 0.0 (0.0%)            | 0.0 (0.0%)            | 0.0 (0.0%)            | 0.0 (0.0%)           | 1.0<br>(50.0%)        | 0.0 (0.0%)             | 1.0<br>(100.0%) | 3.0<br>(13.0%)          |
| Arthralgia |                       |                       |                       |                       |                       |                       |                      |                       |                        |                 |                         |
| <b>No</b>  | 2.0<br>(66.7%)        | 6.0<br>(100.0%)       | 1.0<br>(100.0%)       | 1.0<br>(100.0%)       | 1.0<br>(100.0%)       | 3.0<br>(100.0%)       | 3.0<br>(100.0%)      | 2.0<br>(100.0%)       | 2.0<br>(100.0%)        | 0.0 (0.0%)      | 21.0<br>(91.3%)         |
| <b>Yes</b> | 1.0<br>(33.3%)        | 0.0 (0.0%)            | 0.0 (0.0%)            | 0.0 (0.0%)            | 0.0 (0.0%)            | 0.0 (0.0%)            | 0.0 (0.0%)           | 0.0 (0.0%)            | 0.0 (0.0%)             | 1.0<br>(100.0%) | 2.0 (8.7%)              |
| myositis   |                       |                       |                       |                       |                       |                       |                      |                       |                        |                 |                         |
| <b>No</b>  | 3.0<br>(100.0%)       | 6.0<br>(100.0%)       | 1.0<br>(100.0%)       | 1.0<br>(100.0%)       | 1.0<br>(100.0%)       | 3.0<br>(100.0%)       | 3.0<br>(100.0%)      | 2.0<br>(100.0%)       | 1.0<br>(50.0%)         | 1.0<br>(100.0%) | 22.0<br>(95.7%)         |
| <b>Yes</b> | 0.0 (0.0%)            | 0.0 (0.0%)            | 0.0 (0.0%)            | 0.0 (0.0%)            | 0.0 (0.0%)            | 0.0 (0.0%)            | 0.0 (0.0%)           | 0.0 (0.0%)            | 1.0<br>(50.0%)         | 0.0 (0.0%)      | 1.0 (4.3%)              |
| Raynaud    |                       |                       |                       |                       |                       |                       |                      |                       |                        |                 |                         |
| <b>No</b>  | 3.0<br>(100.0%)       | 6.0<br>(100.0%)       | 1.0<br>(100.0%)       | 1.0<br>(100.0%)       | 1.0<br>(100.0%)       | 3.0<br>(100.0%)       | 3.0<br>(100.0%)      | 2.0<br>(100.0%)       | 2.0<br>(100.0%)        | 1.0<br>(100.0%) | 23.0<br>(100.0%)        |
| <b>Yes</b> | 0.0 (0.0%)            | 0.0 (0.0%)            | 0.0 (0.0%)            | 0.0 (0.0%)            | 0.0 (0.0%)            | 0.0 (0.0%)            | 0.0 (0.0%)           | 0.0 (0.0%)            | 0.0 (0.0%)             | 0.0 (0.0%)      | 0.0 (0.0%)              |
| cutaneous  |                       |                       |                       |                       |                       |                       |                      |                       |                        |                 |                         |
| <b>No</b>  | 2.0<br>(66.7%)        | 5.0<br>(83.3%)        | 1.0<br>(100.0%)       | 1.0<br>(100.0%)       | 1.0<br>(100.0%)       | 3.0<br>(100.0%)       | 3.0<br>(100.0%)      | 1.0<br>(50.0%)        | 2.0<br>(100.0%)        | 1.0<br>(100.0%) | 20.0<br>(87.0%)         |
| <b>Yes</b> | 1.0<br>(33.3%)        | 1.0<br>(16.7%)        | 0.0 (0.0%)            | 0.0 (0.0%)            | 0.0 (0.0%)            | 0.0 (0.0%)            | 0.0 (0.0%)           | 1.0<br>(50.0%)        | 0.0 (0.0%)             | 0.0 (0.0%)      | 3.0<br>(13.0%)          |
| malignancy |                       |                       |                       |                       |                       |                       |                      |                       |                        |                 |                         |
| <b>No</b>  | 3.0<br>(100.0%)       | 6.0<br>(100.0%)       | 1.0<br>(100.0%)       | 1.0<br>(100.0%)       | 1.0<br>(100.0%)       | 3.0<br>(100.0%)       | 3.0<br>(100.0%)      | 2.0<br>(100.0%)       | 2.0<br>(100.0%)        | 1.0<br>(100.0%) | 23.0<br>(100.0%)        |
| <b>Yes</b> | 0.0 (0.0%)            | 0.0 (0.0%)            | 0.0 (0.0%)            | 0.0 (0.0%)            | 0.0 (0.0%)            | 0.0 (0.0%)            | 0.0 (0.0%)           | 0.0 (0.0%)            | 0.0 (0.0%)             | 0.0 (0.0%)      | 0.0 (0.0%)              |

Supplementary table 3: clinical associations of weak-positive MSA

|            | <b>PMScl(100/75)<br/>(N=4)</b> | <b>U1snRNP<br/>(N=1)</b> | <b>Ku<br/>(N=1)</b> | <b>Ro52<br/>(N=10)</b> | <b>Total (N=16)</b> |
|------------|--------------------------------|--------------------------|---------------------|------------------------|---------------------|
| ILD        |                                |                          |                     |                        |                     |
| <b>No</b>  | 4.0 (100.0%)                   | 1.0 (100.0%)             | 1.0 (100.0%)        | 7.0 (70.0%)            | 13.0 (81.2%)        |
| <b>Yes</b> | 0.0 (0.0%)                     | 0.0 (0.0%)               | 0.0 (0.0%)          | 3.0 (30.0%)            | 3.0 (18.8%)         |
| Arthritis  |                                |                          |                     |                        |                     |
| <b>No</b>  | 3.0 (75.0%)                    | 1.0 (100.0%)             | 1.0 (100.0%)        | 8.0 (80.0%)            | 13.0 (81.2%)        |
| <b>Yes</b> | 1.0 (25.0%)                    | 0.0 (0.0%)               | 0.0 (0.0%)          | 2.0 (20.0%)            | 3.0 (18.8%)         |
| Arthralgia |                                |                          |                     |                        |                     |
| <b>No</b>  | 1.0 (25.0%)                    | 1.0 (100.0%)             | 1.0 (100.0%)        | 8.0 (80.0%)            | 11.0 (68.8%)        |
| <b>Yes</b> | 3.0 (75.0%)                    | 0.0 (0.0%)               | 0.0 (0.0%)          | 2.0 (20.0%)            | 5.0 (31.2%)         |
| myositis   |                                |                          |                     |                        |                     |
| <b>No</b>  | 4.0 (100.0%)                   | 0.0 (0.0%)               | 1.0 (100.0%)        | 10.0 (100.0%)          | 15.0 (93.8%)        |
| <b>Yes</b> | 0.0 (0.0%)                     | 1.0 (100.0%)             | 0.0 (0.0%)          | 0.0 (0.0%)             | 1.0 (6.2%)          |
| Raynaud    |                                |                          |                     |                        |                     |
| <b>No</b>  | 3.0 (75.0%)                    | 1.0 (100.0%)             | 1.0 (100.0%)        | 7.0 (70.0%)            | 12.0 (75.0%)        |
| <b>Yes</b> | 1.0 (25.0%)                    | 0.0 (0.0%)               | 0.0 (0.0%)          | 3.0 (30.0%)            | 4.0 (25.0%)         |
| cutaneous  |                                |                          |                     |                        |                     |
| <b>No</b>  | 3.0 (75.0%)                    | 1.0 (100.0%)             | 1.0 (100.0%)        | 6.0 (60.0%)            | 11.0 (68.8%)        |
| <b>Yes</b> | 1.0 (25.0%)                    | 0.0 (0.0%)               | 0.0 (0.0%)          | 4.0 (40.0%)            | 5.0 (31.2%)         |
| malignancy |                                |                          |                     |                        |                     |
| <b>No</b>  | 4.0 (100.0%)                   | 1.0 (100.0%)             | 1.0 (100.0%)        | 9.0 (90.0%)            | 15.0 (93.8%)        |
| <b>Yes</b> | 0.0 (0.0%)                     | 0.0 (0.0%)               | 0.0 (0.0%)          | 1.0 (10.0%)            | 1.0 (6.2%)          |

Supplementary table 4: clinical associations of weak-positive MAA

|                                  | <b>Mi2b<br/>(N=3)</b> | <b>MDA5<br/>(N=1)</b> | <b>NXP2<br/>(N=2)</b> | <b>SAE1<br/>(N=1)</b> | <b>Jo-1<br/>(N=2)</b> | <b>SRP<br/>(N=2)</b> | <b>PL-7<br/>(N=2)</b> | <b>PL-12<br/>(N=4)</b> | <b>EJ<br/>(N=2)</b> | <b>OJ<br/>(N=2)</b> | <b>Total<br/>(N=21)</b> |
|----------------------------------|-----------------------|-----------------------|-----------------------|-----------------------|-----------------------|----------------------|-----------------------|------------------------|---------------------|---------------------|-------------------------|
| <b>Final diagnosis</b>           |                       |                       |                       |                       |                       |                      |                       |                        |                     |                     |                         |
| <b>Inflammatory myositis</b>     | 1.0<br>(33.3%)        | 1.0<br>(100.0%)       | 1.0<br>(50.0%)        | 1.0<br>(100.0%)       | 0.0<br>(0.0%)         | 0.0<br>(0.0%)        | 0.0<br>(0.0%)         | 0.0<br>(0.0%)          | 0.0<br>(0.0%)       | 0.0<br>(0.0%)       | 4.0<br>(19.0%)          |
| <b>Interstitial lung disease</b> | 0.0<br>(0.0%)         | 0.0<br>(0.0%)         | 0.0<br>(0.0%)         | 0.0<br>(0.0%)         | 2.0<br>(100.0%)       | 1.0<br>(50.0%)       | 2.0<br>(100.0%)       | 3.0<br>(75.0%)         | 1.0<br>(50.0%)      | 1.0<br>(50.0%)      | 10.0<br>(47.6%)         |
| <b>Connective tissue disease</b> | 0.0<br>(0.0%)         | 0.0<br>(0.0%)         | 0.0<br>(0.0%)         | 0.0<br>(0.0%)         | 0.0<br>(0.0%)         | 1.0<br>(50.0%)       | 0.0<br>(0.0%)         | 0.0<br>(0.0%)          | 1.0<br>(50.0%)      | 1.0<br>(50.0%)      | 3.0<br>(14.3%)          |
| <b>Others</b>                    | 2.0<br>(66.7%)        | 0.0<br>(0.0%)         | 1.0<br>(50.0%)        | 0.0<br>(0.0%)         | 0.0<br>(0.0%)         | 0.0<br>(0.0%)        | 0.0<br>(0.0%)         | 1.0<br>(25.0%)         | 0.0<br>(0.0%)       | 0.0<br>(0.0%)       | 4.0<br>(19.0%)          |

Supplementary table 5: strong-positive MSA and final diagnosis

|                                  | <b>PMScl (100/75)<br/>(N=4)</b> | <b>U1snRNP<br/>(N=2)</b> | <b>Ku<br/>(N=2)</b> | <b>Ro52<br/>(N=28)</b> | <b>Total<br/>(N=36)</b> |
|----------------------------------|---------------------------------|--------------------------|---------------------|------------------------|-------------------------|
| <b>Final diagnosis</b>           |                                 |                          |                     |                        |                         |
| <b>Inflammatory myositis</b>     | 1.0 (25.0%)                     | 0.0 (0.0%)               | 0.0 (0.0%)          | 3.0 (10.7%)            | 4.0 (11.1%)             |
| <b>Interstitial lung disease</b> | 1.0 (25.0%)                     | 0.0 (0.0%)               | 0.0 (0.0%)          | 9.0 (32.1%)            | 10.0 (27.8%)            |
| <b>Connective tissue disease</b> | 1.0 (25.0%)                     | 2.0 (100.0%)             | 0.0 (0.0%)          | 9.0 (32.1%)            | 12.0 (33.3%)            |
| <b>Others</b>                    | 1.0 (25.0%)                     | 0.0 (0.0%)               | 2.0<br>(100.0%)     | 7.0 (25.0%)            | 10.0 (27.8%)            |

Supplementary table 6: strong-positive MAA and final diagnosis

|                                  | <b>Mi2a<br/>(N=3)</b> | <b>Mi2b<br/>(N=6)</b> | <b>TIF-1<br/>(N=1)</b> | <b>MDA5<br/>(N=1)</b> | <b>NXP2<br/>(N=1)</b> | <b>SAE1<br/>(N=3)</b> | <b>SRP<br/>(N=3)</b> | <b>PL-7<br/>(N=2)</b> | <b>PL-12<br/>(N=2)</b> | <b>OJ<br/>(N=1)</b> | <b>Total<br/>(N=23)</b> |
|----------------------------------|-----------------------|-----------------------|------------------------|-----------------------|-----------------------|-----------------------|----------------------|-----------------------|------------------------|---------------------|-------------------------|
| <b>Final diagnosis</b>           |                       |                       |                        |                       |                       |                       |                      |                       |                        |                     |                         |
| <b>Interstitial lung disease</b> | 1.0<br>(33.3%)        | 2.0<br>(33.3%)        | 0.0<br>(0.0%)          | 1.0<br>(100.0%)       | 1.0<br>(100.0%)       | 1.0<br>(33.3%)        | 3.0<br>(100.0%)      | 1.0<br>(50.0%)        | 1.0<br>(50.0%)         | 0.0<br>(0.0%)       | 11.0<br>(47.8%)         |
| <b>Connective tissue disease</b> | 1.0<br>(33.3%)        | 0.0<br>(0.0%)         | 0.0<br>(0.0%)          | 0.0<br>(0.0%)         | 0.0<br>(0.0%)         | 0.0<br>(0.0%)         | 0.0<br>(0.0%)        | 1.0<br>(50.0%)        | 0.0<br>(0.0%)          | 0.0<br>(0.0%)       | 2.0<br>(8.7%)           |
| <b>Others</b>                    | 1.0<br>(33.3%)        | 4.0<br>(66.7%)        | 1.0<br>(100.0%)        | 0.0<br>(0.0%)         | 0.0<br>(0.0%)         | 2.0<br>(66.7%)        | 0.0<br>(0.0%)        | 0.0<br>(0.0%)         | 1.0<br>(50.0%)         | 1.0<br>(100.0%)     | 10.0<br>(43.5%)         |

Supplementary table 7: weak-positive MSA and final diagnosis

|                                  | <b>PMScl (100/75)<br/>(N=4)</b> | <b>U1snRNP<br/>(N=1)</b> | <b>Ku (N=1)</b> | <b>Ro52<br/>(N=10)</b> | <b>Total<br/>(N=16)</b> |
|----------------------------------|---------------------------------|--------------------------|-----------------|------------------------|-------------------------|
| <b>Final diagnosis</b>           |                                 |                          |                 |                        |                         |
| <b>Interstitial lung disease</b> | 0.0 (0.0%)                      | 0.0 (0.0%)               | 0.0 (0.0%)      | 2.0 (20.0%)            | 2.0 (12.5%)             |
| <b>Connective tissue disease</b> | 0.0 (0.0%)                      | 0.0 (0.0%)               | 0.0 (0.0%)      | 4.0 (40.0%)            | 4.0 (25.0%)             |
| <b>Others</b>                    | 4.0 (100.0%)                    | 1.0 (100.0%)             | 1.0<br>(100.0%) | 4.0 (40.0%)            | 10.0 (62.5%)            |

Supplementary table 8: weak-positive MAA and final diagnosis
